# Supplementary material for: 3D Printing Ultraflexible Magnetic Actuators via Screw Extrusion Method
Source: PubMed Central journal article supplement (PMC9165489; doi:10.1002/advs.202200898), 2022-03-28
Supplement: ADVS-9-2200898-s003.pdf [file ADVS-9-2200898-s003.pdf]

**Supporting Information****3D Printing Ultra-flexible Magnetic Actuators *via* Screw Extrusion Method**

*Xufeng Cao, Shouhu Xuan\*, Yinduan Gao, Congcong Lou, Huaxia Deng, Xinglong Gong\**

CAS Key Laboratory of Mechanical Behavior and Design of Materials, Department of Modern Mechanics, University of Science and Technology of China, Hefei 230027, China  
E-mail: gongxl@ustc.edu.cn (XL Gong); xuansh@ustc.edu.cn (SH Xuan).

**Supplementary Figures**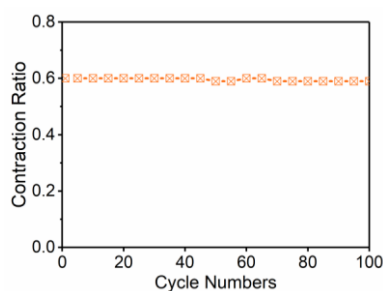

**Figure S1.** Cycle test of the contraction deformation performance.

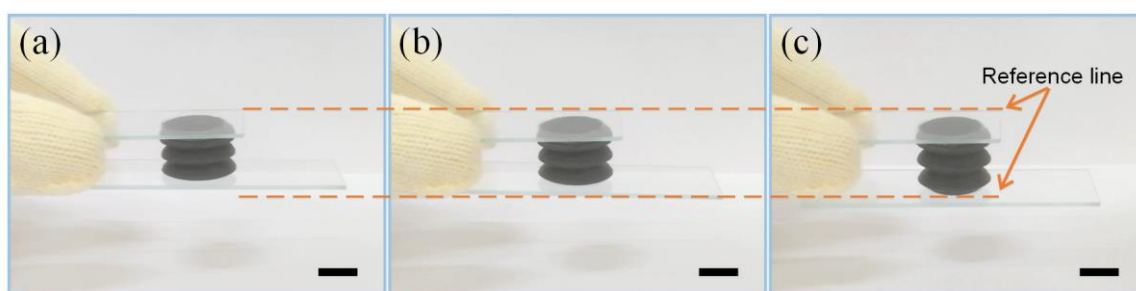

**Figure S2.** (a-c) Digital images of the deformation process with the air leakage. (Scale bar: 10 mm)

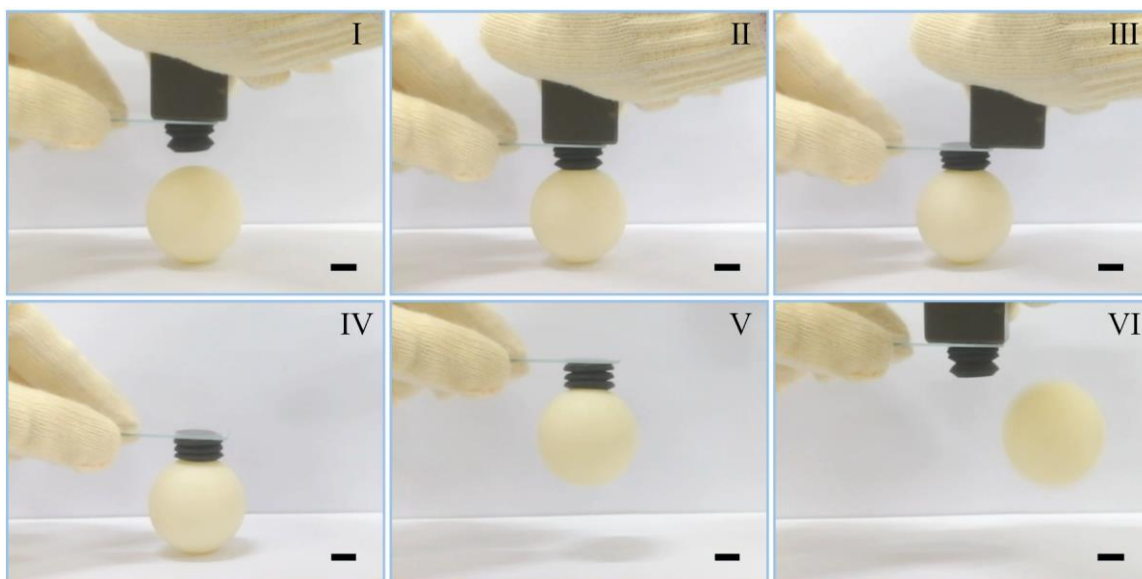

**Figure S3.** Snapshots of sequential grasping and releasing the table tennis with sucker actuator. (Scale bar: 10 mm)

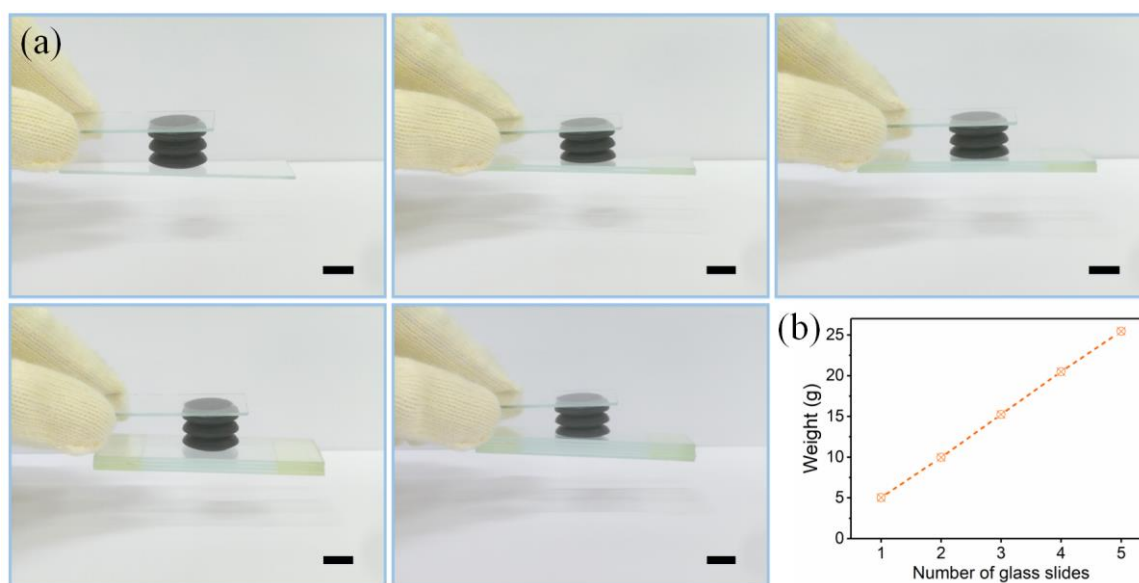

**Figure S4.** (a) Digital images of grasping the glass slides (Scale bar: 10 mm). (b) The weight versus the number of glass slides.
